# Supplementary material for: Fully transparent flexible 2D molybdenum disulfide transistors
Source: Research Square preprint supplement (doi:10.21203/rs.3.rs-4458942/v1), 2025-08-13
Supplement: Supplementary file 1 [file 88d35dbf69d01d5b3f7090e2.docx]

**SUPPLEMENTARY INFORMATION**

**Fully transparent flexible 2D molybdenum disulfide transistors**

Yang Li1,2#, Lejuan Cai1#, Nan Cui1#*, Xiaoru Li1,3#, Tinghe Yun1, Bohan Wei1, Youchen Chen1, Hua Yu1, Zhenhe Zhao1, Nianqing Fu4, Lede Xian1, Qingqing Ke3, Wenlong Wang1, Shusheng Pan2*, Guangyu Zhang1* and Shenghuang Lin1*

1Songshan Lake Materials Laboratory, Dongguan, China.

2School of Physics and Materials Science, Guangzhou University, Guangzhou, China.

3School of Microelectronics Science and Technology, Sun Yat-sen University, Zhuhai, China.

4School of Materials Science and Engineering, South China University of Technology, Guangzhou, China.

#These authors contributed equally: Yang Li, Lejuan Cai, Nan Cui, Xiaoru Li.

*Corresponding author e-mail: cuinan@sslab.org.cn; sspan@gzhu.edu.cn; gyzhang@sslab.org.cn; [linshenghuang@sslab.org.cn](mailto:linshenghuang@sslab.org.cn)


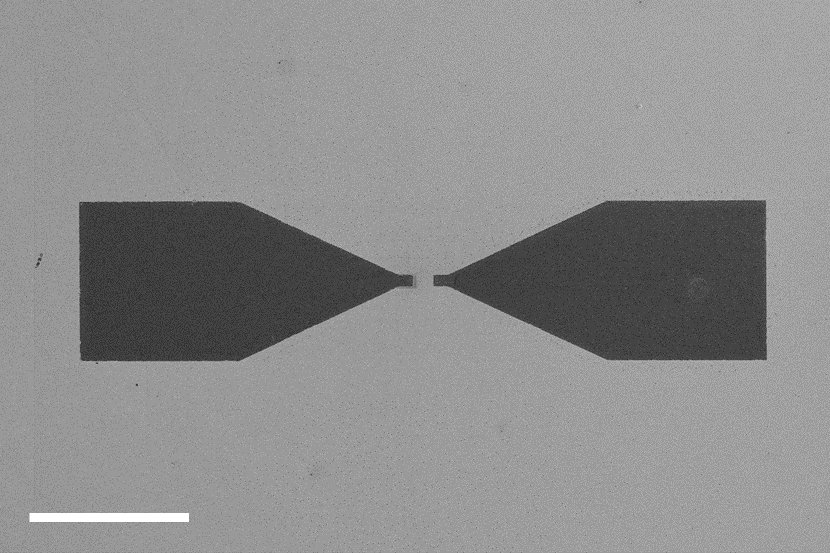


**Supplementary Fig. S1** SEM image of PEDOT:PSS pattern fabricated by lithography. Scale bar, 200 µm.


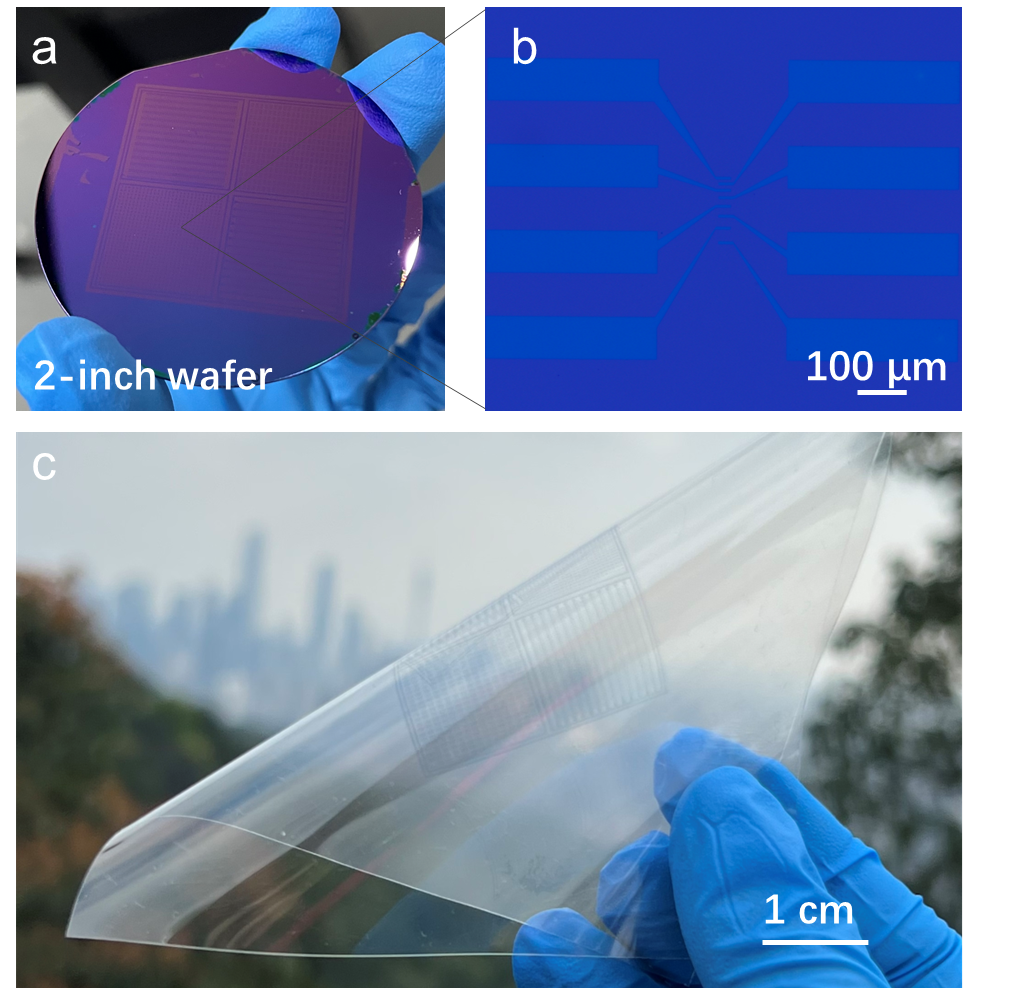


**Supplementary Fig. S2 a,** Optical image of PEDOT:PSS pattern on 2-inch SiO2 wafer. **b,** Optical micrograph of PEDOT:PSS electrode on SiO2. **c,** Optical image of PEDOT:PSS pattern transferred onto the flexible PET substrate.

**
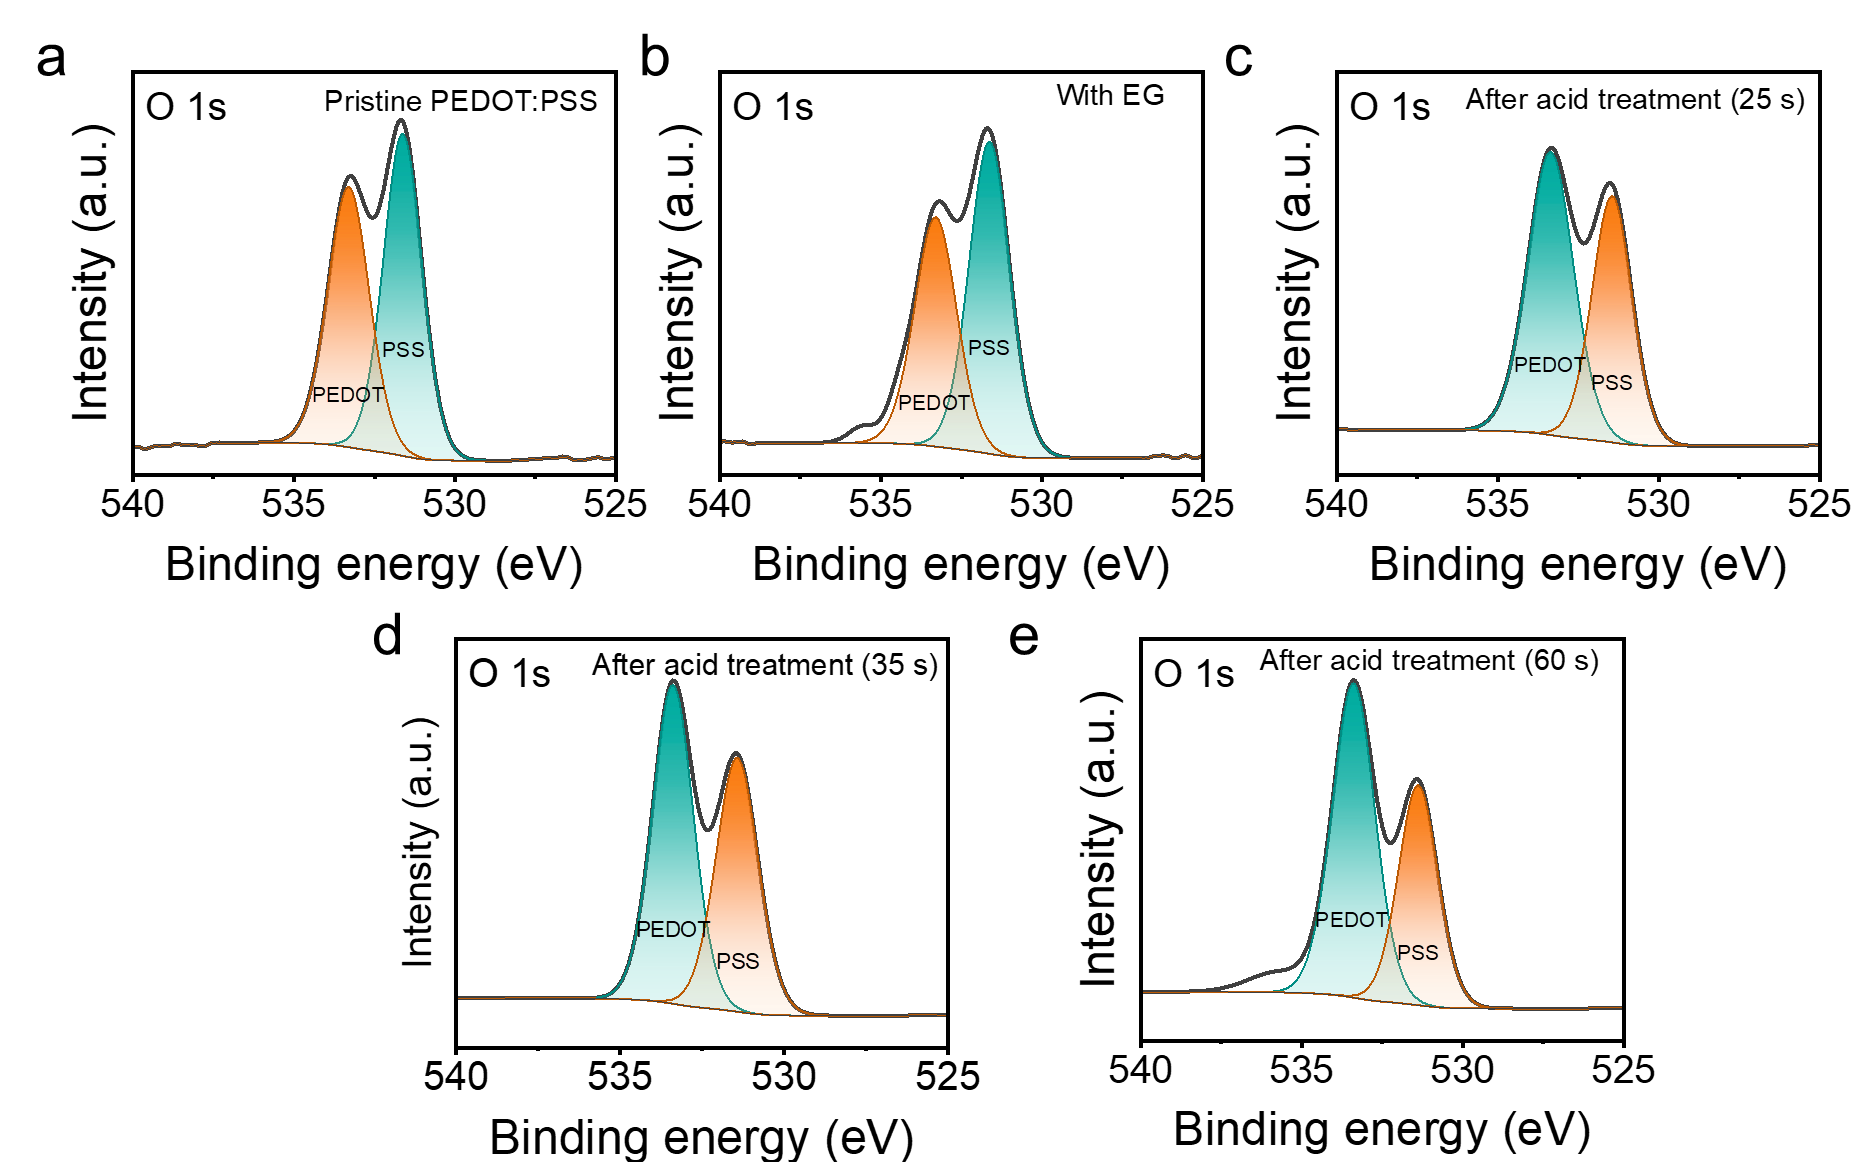
**

**Supplementary Fig. S3 XPS for O 1s in PEDOT:PSS with different treatments.** **a**, Pristine films. **b**, PEDOT:PS with the addition of EG. **c-e**, PEDOT:PS with acid treatments.

**
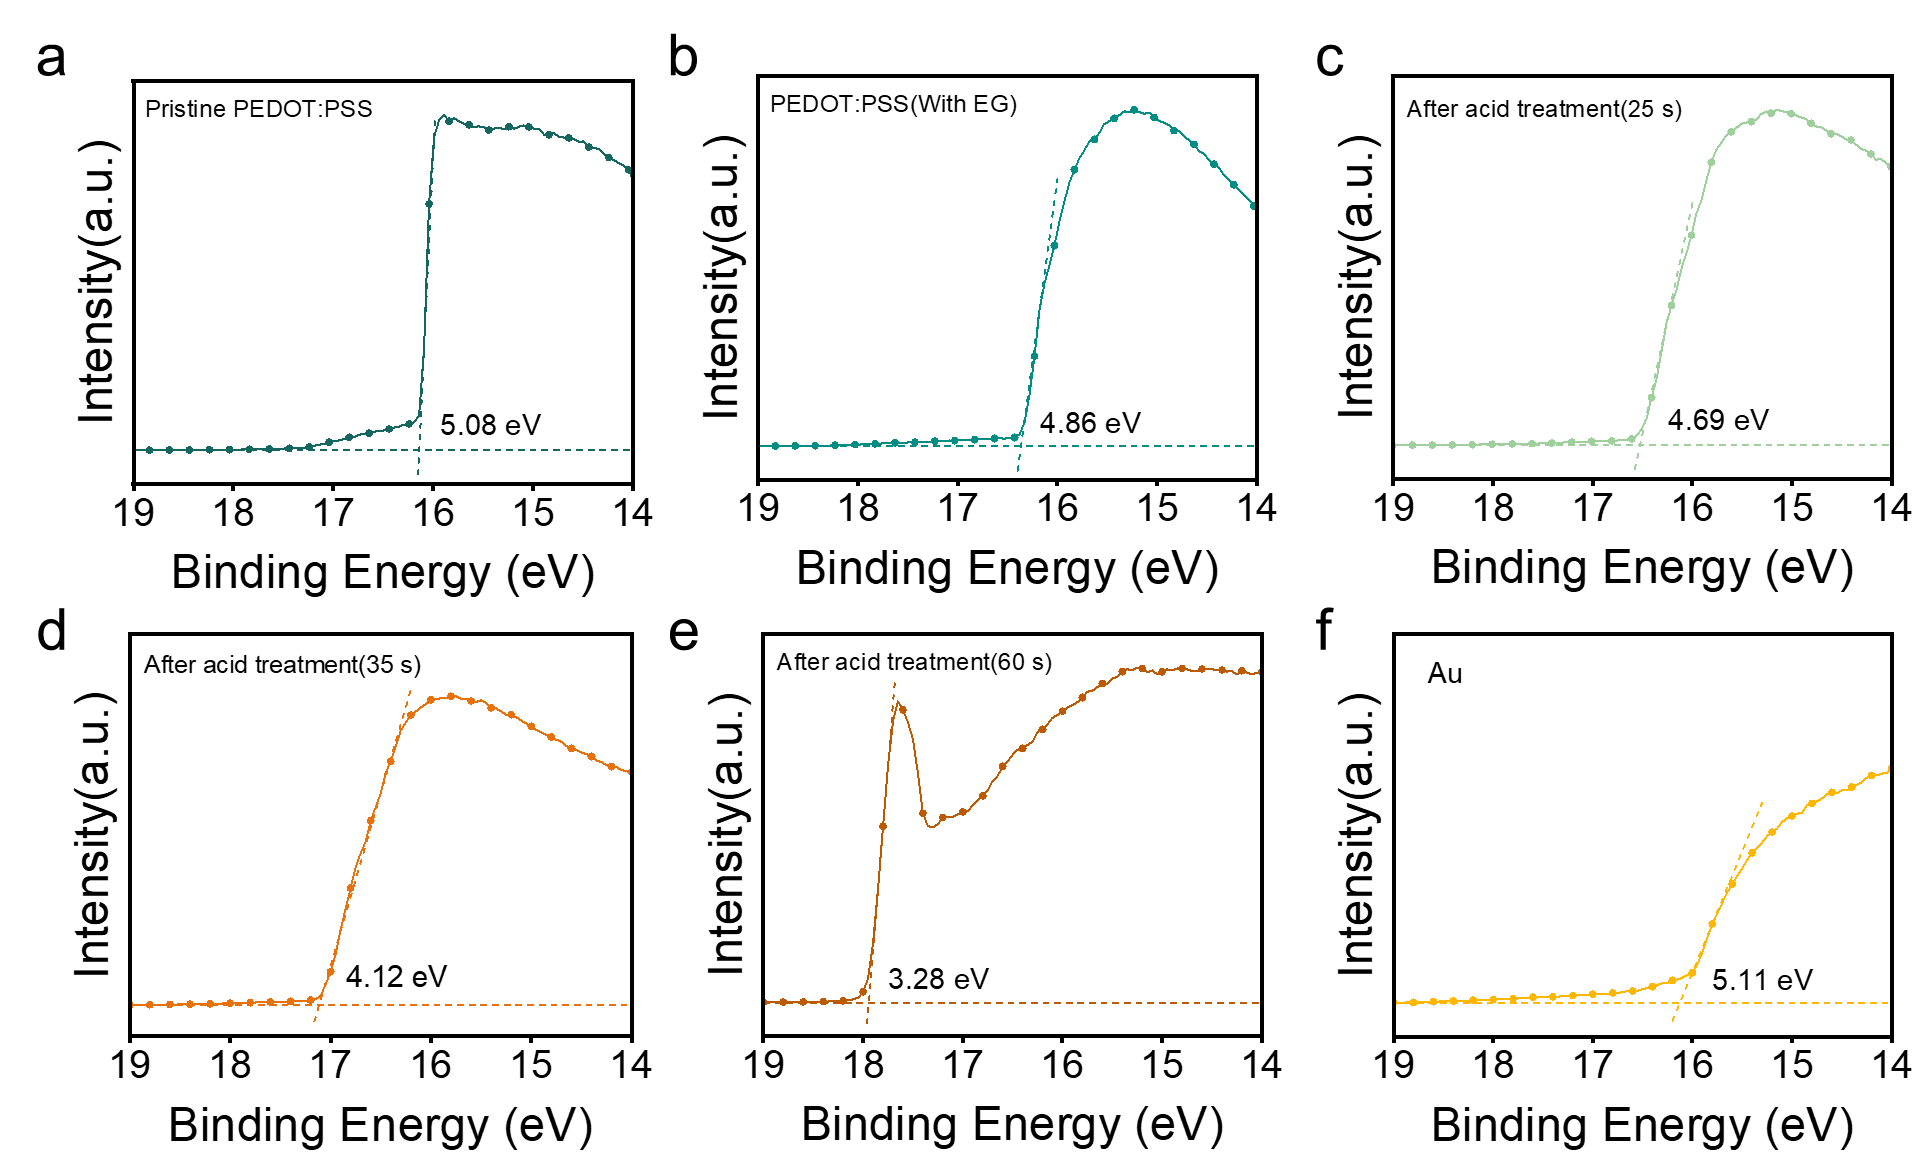
**

**Supplementary Fig. S4 UPS analysis results.** **a-e**, PEDOT:PSS with various treatments. **f**, Au electrode for calibration.

**
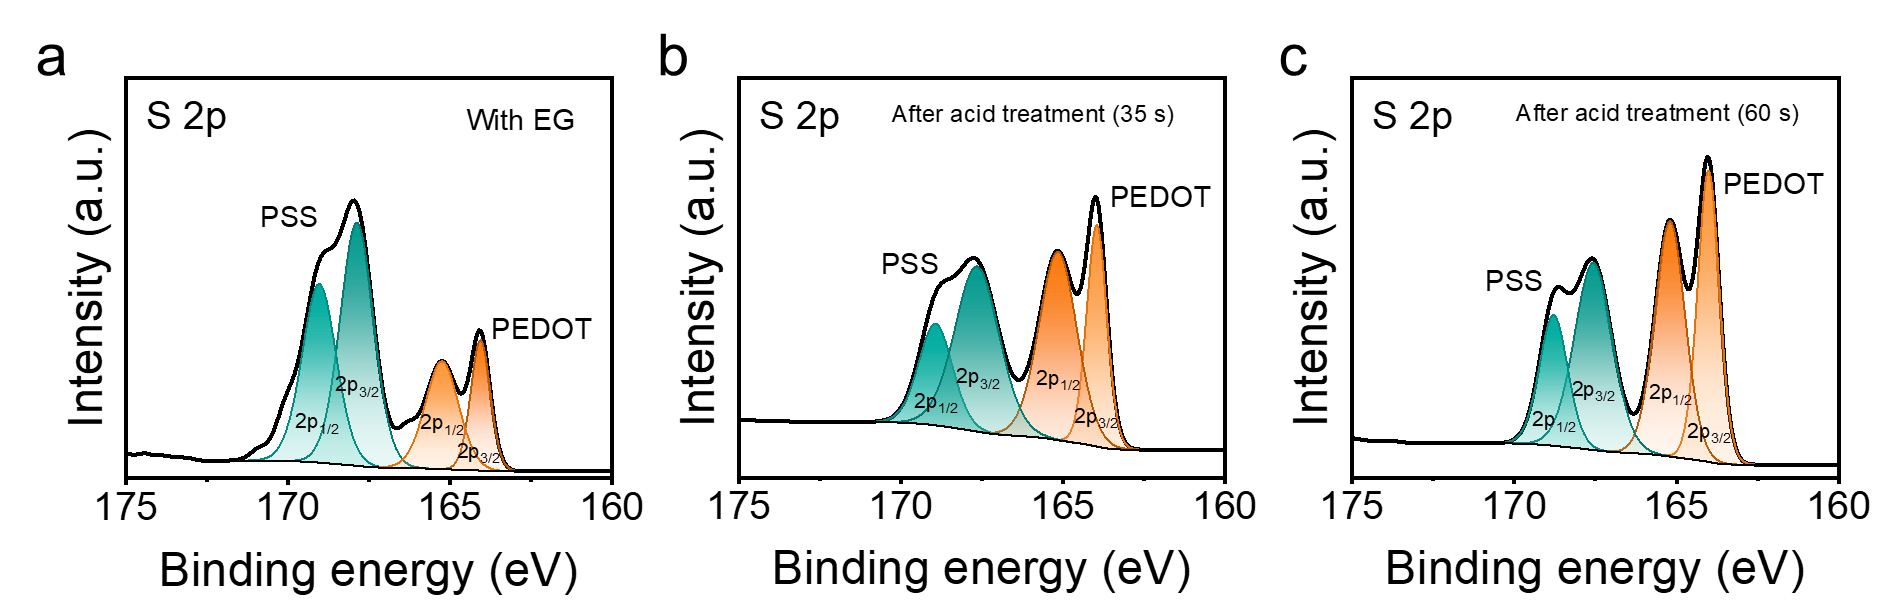
**

**Supplementary Fig. S5 XPS for S 2P in PEDOT:PSS with different treatments. a**, PEDOT:PSS with the addition of EG (Sample B). **b**,**c**, PEDOT:PSS with 35-s and 60-s acid treatments in in correspondence with Sample D and E.

The XPS in Fig. 1b and Fig. 1c correspond to Sample A and C.

**
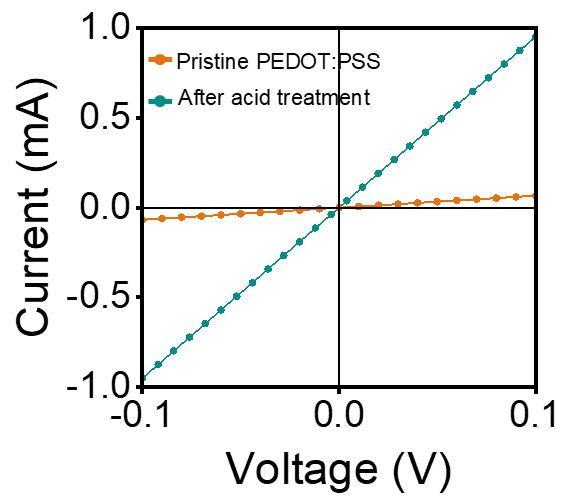
**

**Supplementary Fig. S6***I-V* curves of PEDOT:PSS w/o and with acid treatment.

**
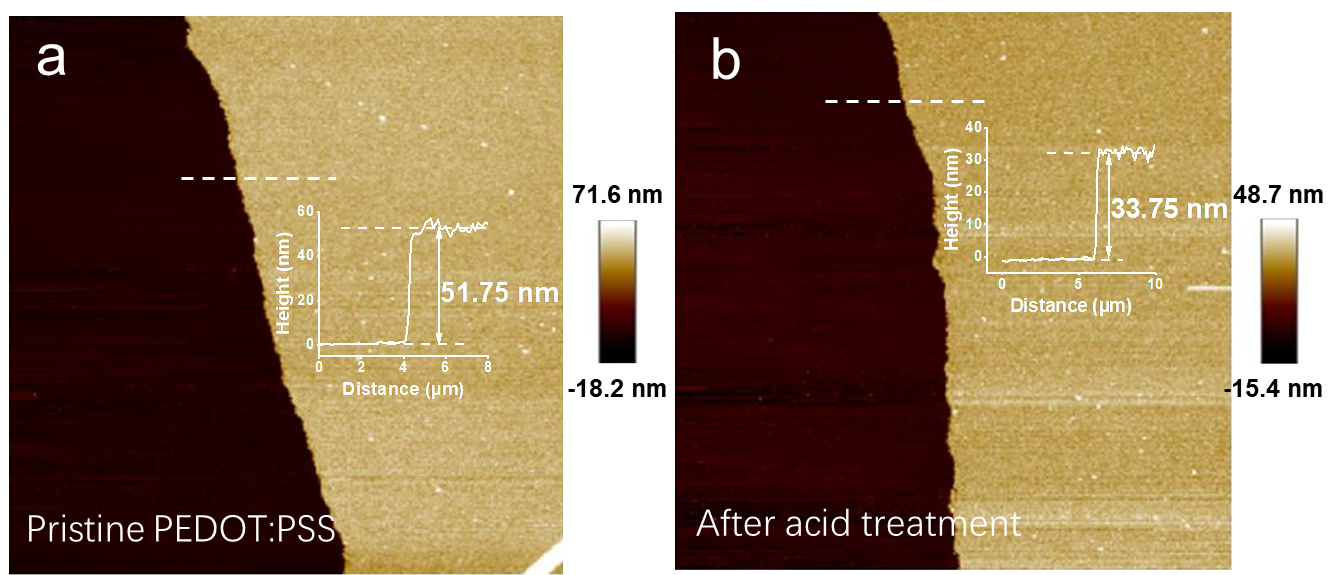
**

**Supplementary Fig. S7 AFM images of the PEDOT:PSS. a**, Pristine PEDOT:PSS. **b**, PEDOT:PSS with acid treatment. The insets show that the thickness of PEDOT:PSS w/o and with acid treatment are 51.75 nm and 33.75 nm, respectively.


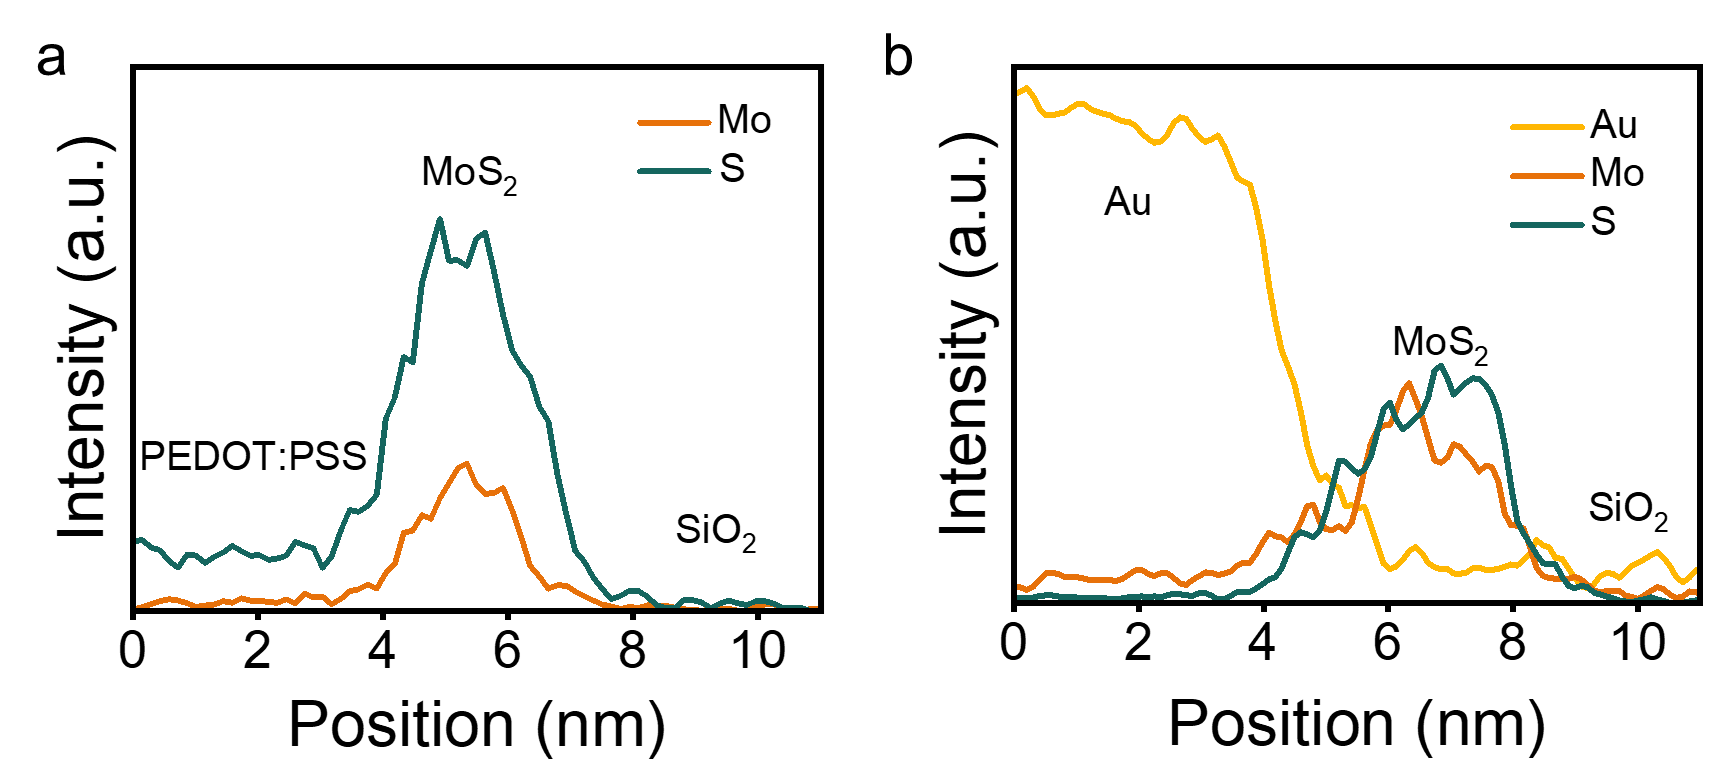


**Supplementary Fig. S8 a**, EDS line profiles for Mo and S signals in PEDOT:PSS/MoS2, and **b**, Au, Mo, and S signals in Au/MoS2 on SiO2.


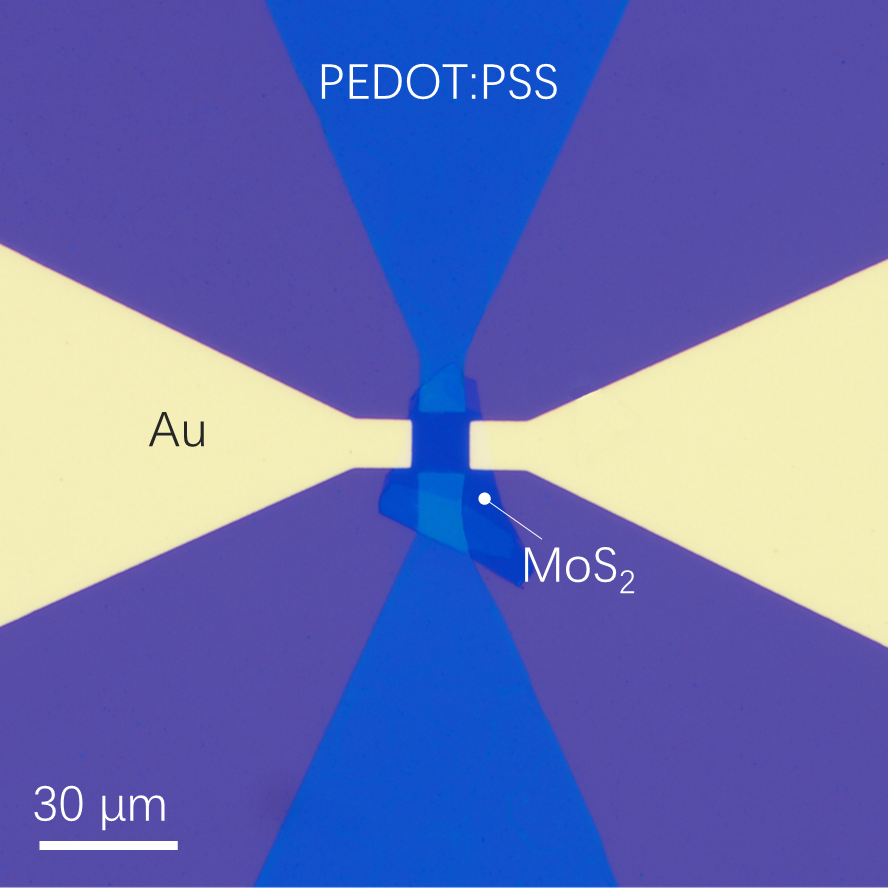


**Supplementary Fig. S9** Optical micrograph of typical FETs with PEDOT:PSS and Au electrodes on identical MoS2 flake.

**Supplementary Table S1.** Performance comparison of MoS2 FETs based on PEDOT:PSS and Au electrode.

**
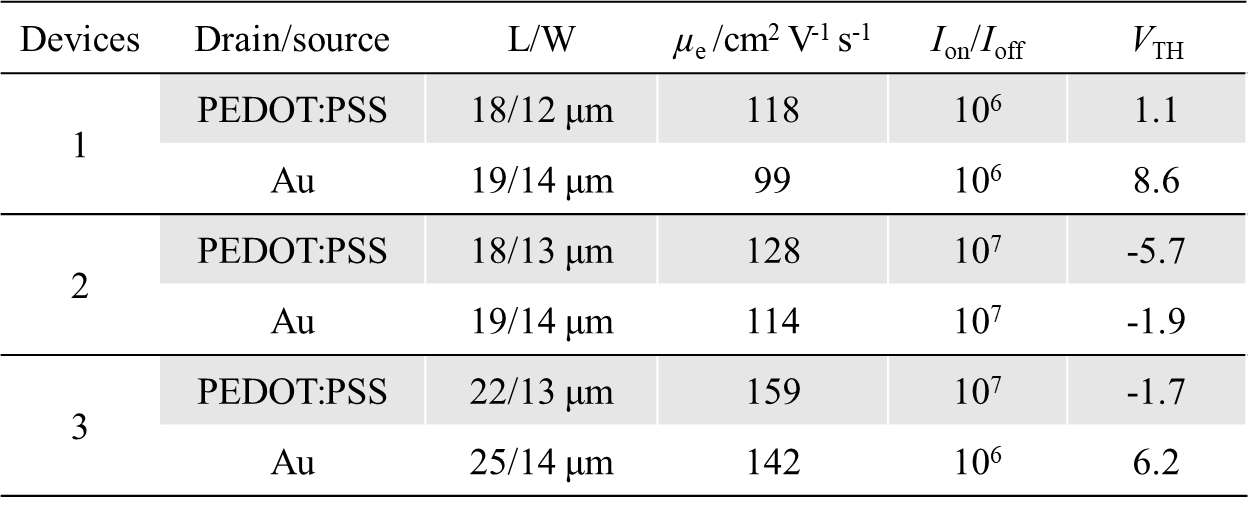
**

In MoS₂ transistors employing PEDOT:PSS as source/drain electrodes, the negative shift in threshold voltage (*V*TH) primarily arises from the synergistic effects of optimized electrode-channel interfacial properties and electrode-induced n-type doping. First, acid treatment modulates the work function of PEDOT:PSS, reducing it from its intrinsic value to align closely with the conduction band minimum (CBM) of MoS₂. This significantly mitigates interfacial energy band misalignment, suppressing Fermi-level pinning effects and facilitating the transition from Schottky to Ohmic contacts. This process reduces electron injection barriers. However, interfacial band alignment alone cannot fully account for the *V*TH shift, as it merely diminishes the gate voltage compensation required for barrier modulation. Even under near-ideal work function matching, chemical interactions between the electrode material and MoS₂ introduce additional doping effects. Second, acidic components in PEDOT:PSS (e.g., sulfonic acid groups) react with sulfur vacancies in MoS₂ at the interface, releasing protons (H⁺) to passivate defect states and inducing charge transfer. The sulfur vacancies capture H⁺ to form localized positive charge centers, whose electrostatic effects substantially increase the electron concentration in the MoS₂ conduction band. This is equivalent to a donor doping mechanism, shifting the Fermi level of MoS₂ toward its CBM and directly reducing the gate voltage required to activate the channel.[1-4]

**Supplementary S10.** Mobility calculation.

The carrier mobility based on a three-terminal FET can be extracted from the transfer curve of the device. Based on the linear region of the transfer characteristic and device structure, the field-effect carrier mobility can be calculated as:

Here *L* and *W* are the channel length and width, respectively. *C*ox is the gate capacitance per unit area (= 11 nF/cm2 for 300 nm-SiO2), and is the transconductance, which can be extracted from the transfer curve as:

**
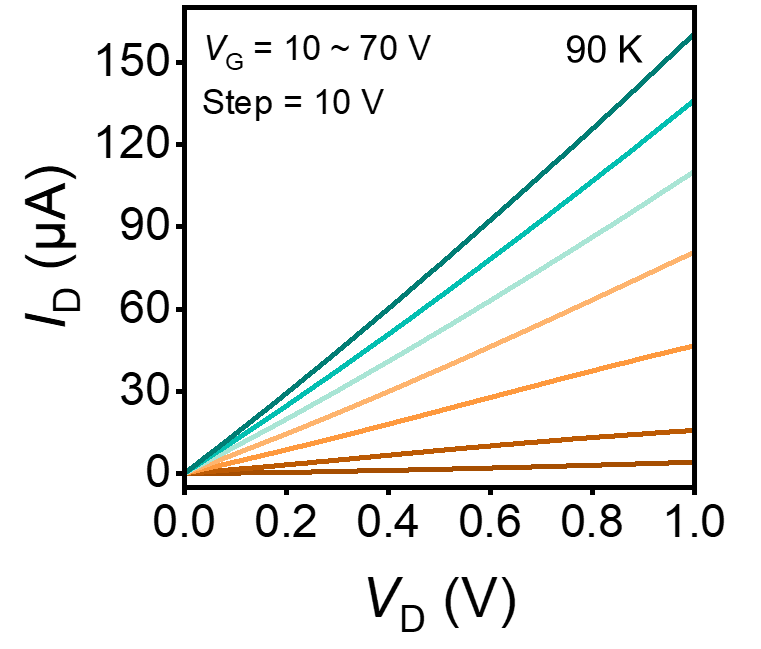
**

**Supplementary Fig. S11** Output characteristics of the PEDOT:PSS/MoS2 FET at the low temperature of 90 K.

**
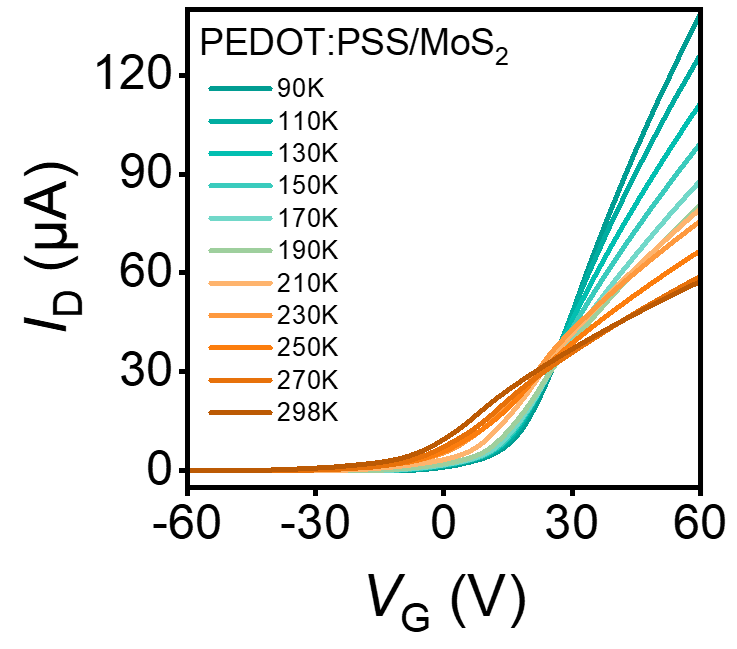
**

**Supplementary Fig. S12** Transfer curves of MoS2 FET based on PEDOT:PSS electrode at different temperatures.

In van der Waals transfer-fabricated PEDOT:PSS/MoS₂ field-effect transistors (FETs), although Ohmic characteristics with low contact resistance are achieved through interfacial energy-level alignment, the nonlinearity of *I*D-*V*G curves under high gate voltages remains predominantly governed by the carrier transport mechanisms within the channel. When the gate voltage increases substantially, the lateral electric field in the channel exceeds a critical threshold, triggering the carrier velocity saturation effect: under strong electric fields, the electron drift velocity becomes limited by intrinsic phonon scattering within the material, causing the drain current growth rate to transition from linear to sublinear. Concurrently, the enhanced vertical electric field confines carriers near the channel interface, intensifying interface roughness scattering and surface phonon scattering, which markedly reduces the effective mobility and further disrupts current-voltage linearity. [5-7]

Additionally, self-heating effects and carrier concentration modulation under high bias jointly exacerbate nonlinearity. Joule heating elevates the channel temperature, establishing a negative feedback loop through enhanced phonon scattering and temperature-dependent mobility degradation, thereby aggravating current saturation tendencies. As demonstrated in low-temperature measurements (*T* < 100 K), where phonon scattering is suppressed, the *I*D-*V*G linearity of MoS₂ FETs shows significant improvement, confirming the dominant role of thermal phonon scattering.[8]

*
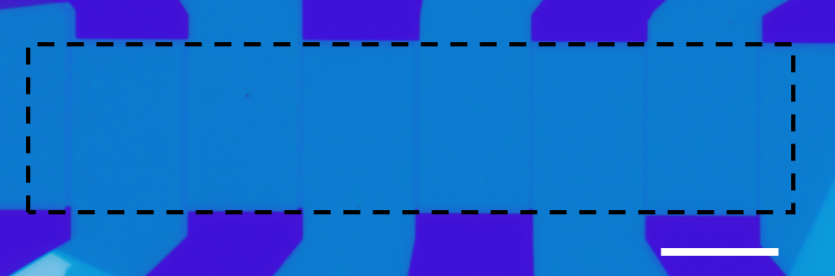
*

**Supplementary Fig. S13** Optical microscope image of MoS2 FETs based on PEDOT:PSS electrodes at various channel lengths (*L*). Scale bar, 20 µm.


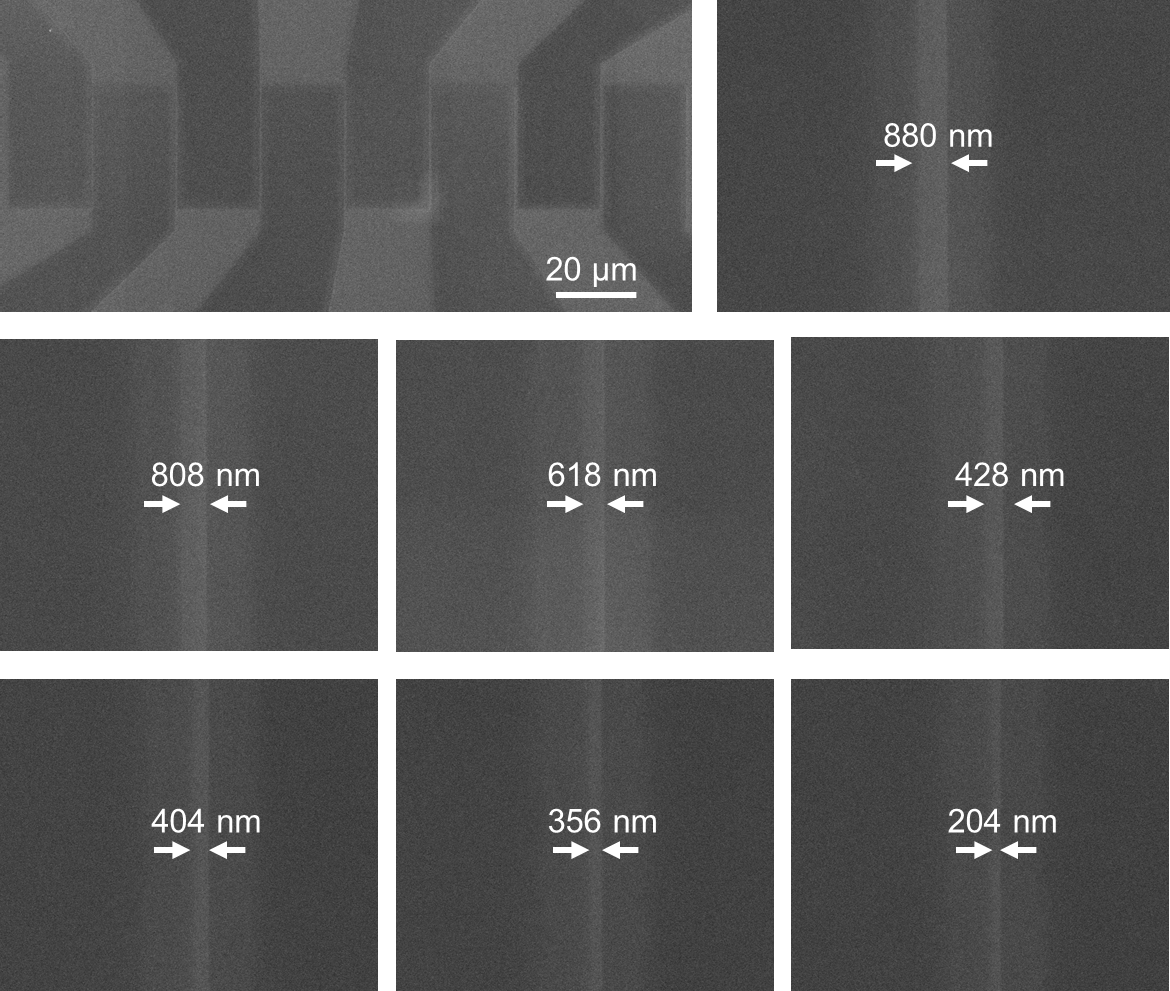


**Supplementary Fig. S14** SEM images of the transferred PEDOT:PSS electrodes for TLM measurements.

**Supplementary Fig. S15** Output characteristic curves for the PEDOT:PSS/MoS2 device with channel length of 860 nm.


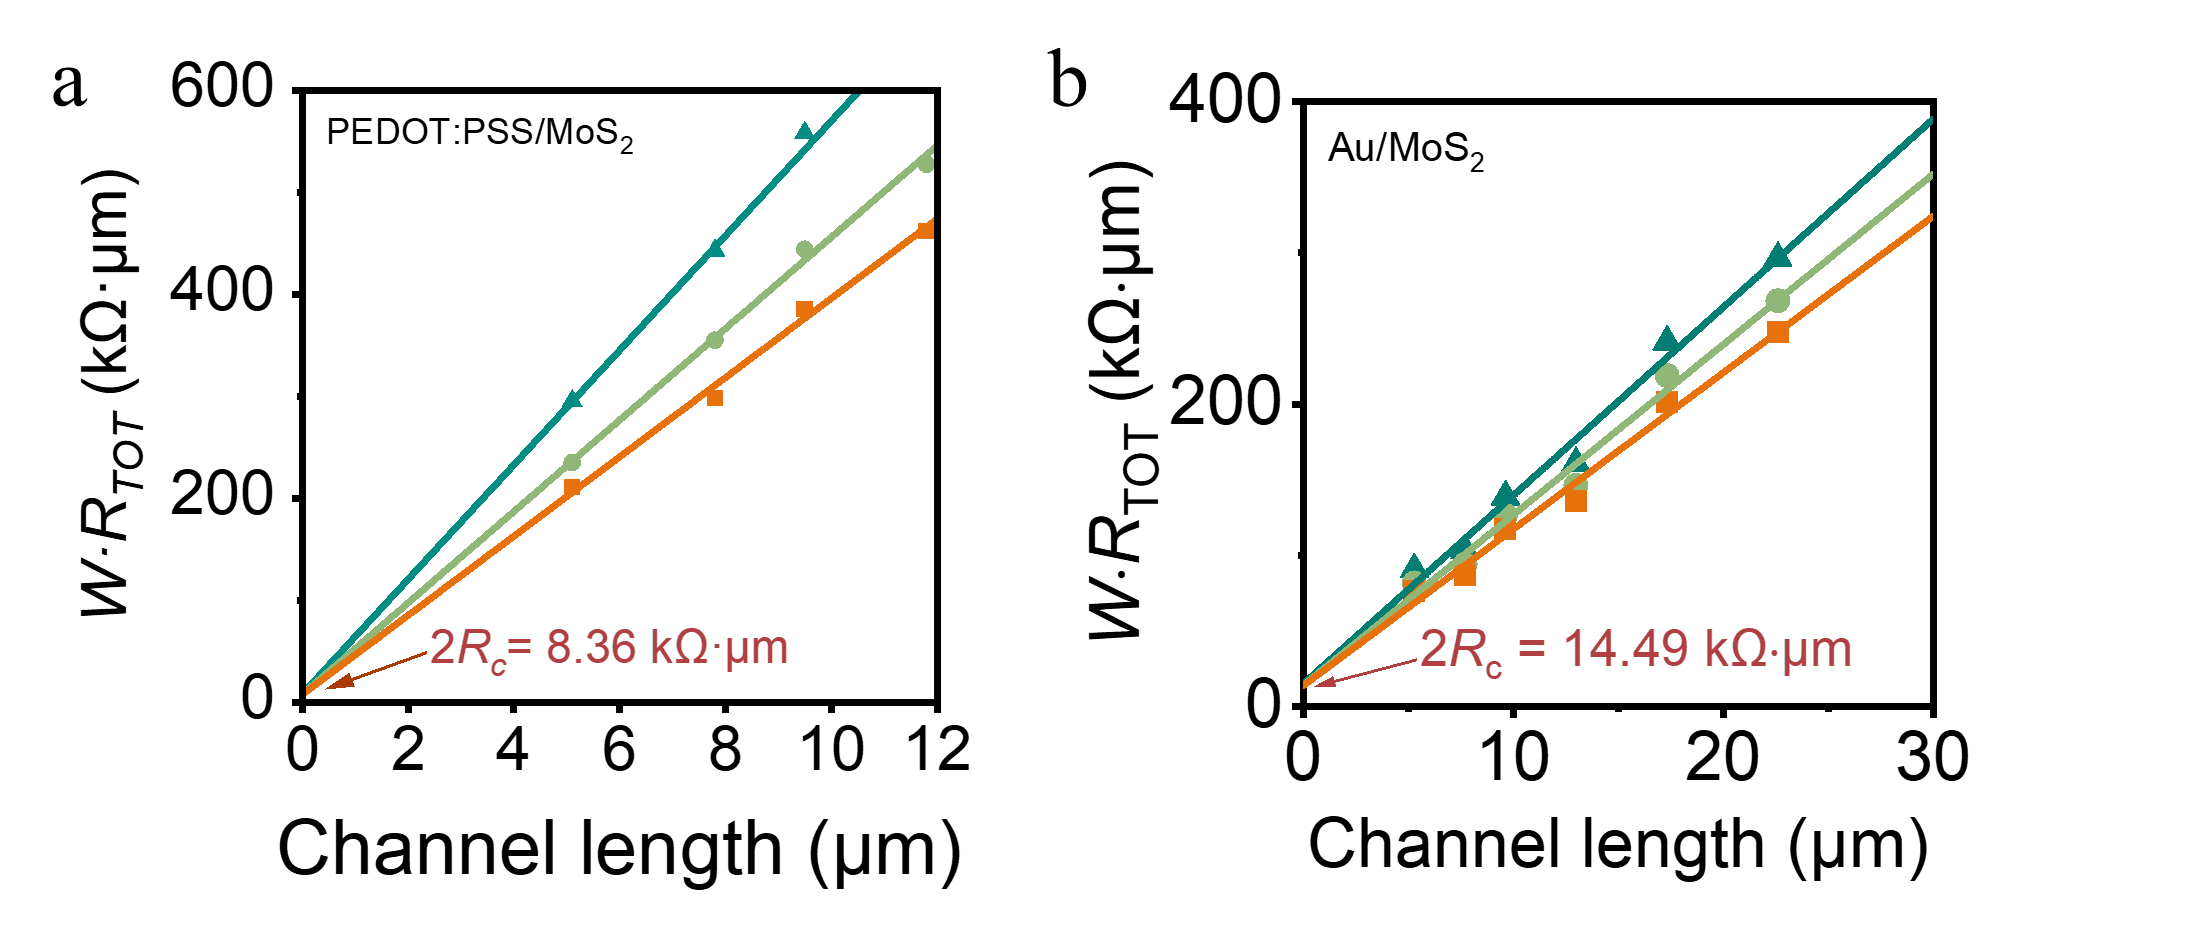


**Supplementary Fig. S16** *W*×*R*TOT versus channel lengths for MoS2 devices with transferred (a) PEDOT:PSS and (b) Au contacts.

**Supplementary Fig. S17** Histogram distributions of field-effect mobility (*µ*e) of MoS2 FETs with PEDOT:PSS electrodes.

**Supplementary Table S2.** Comparison of the typical characteristics in the reported MoS2 FETs.[9-31]


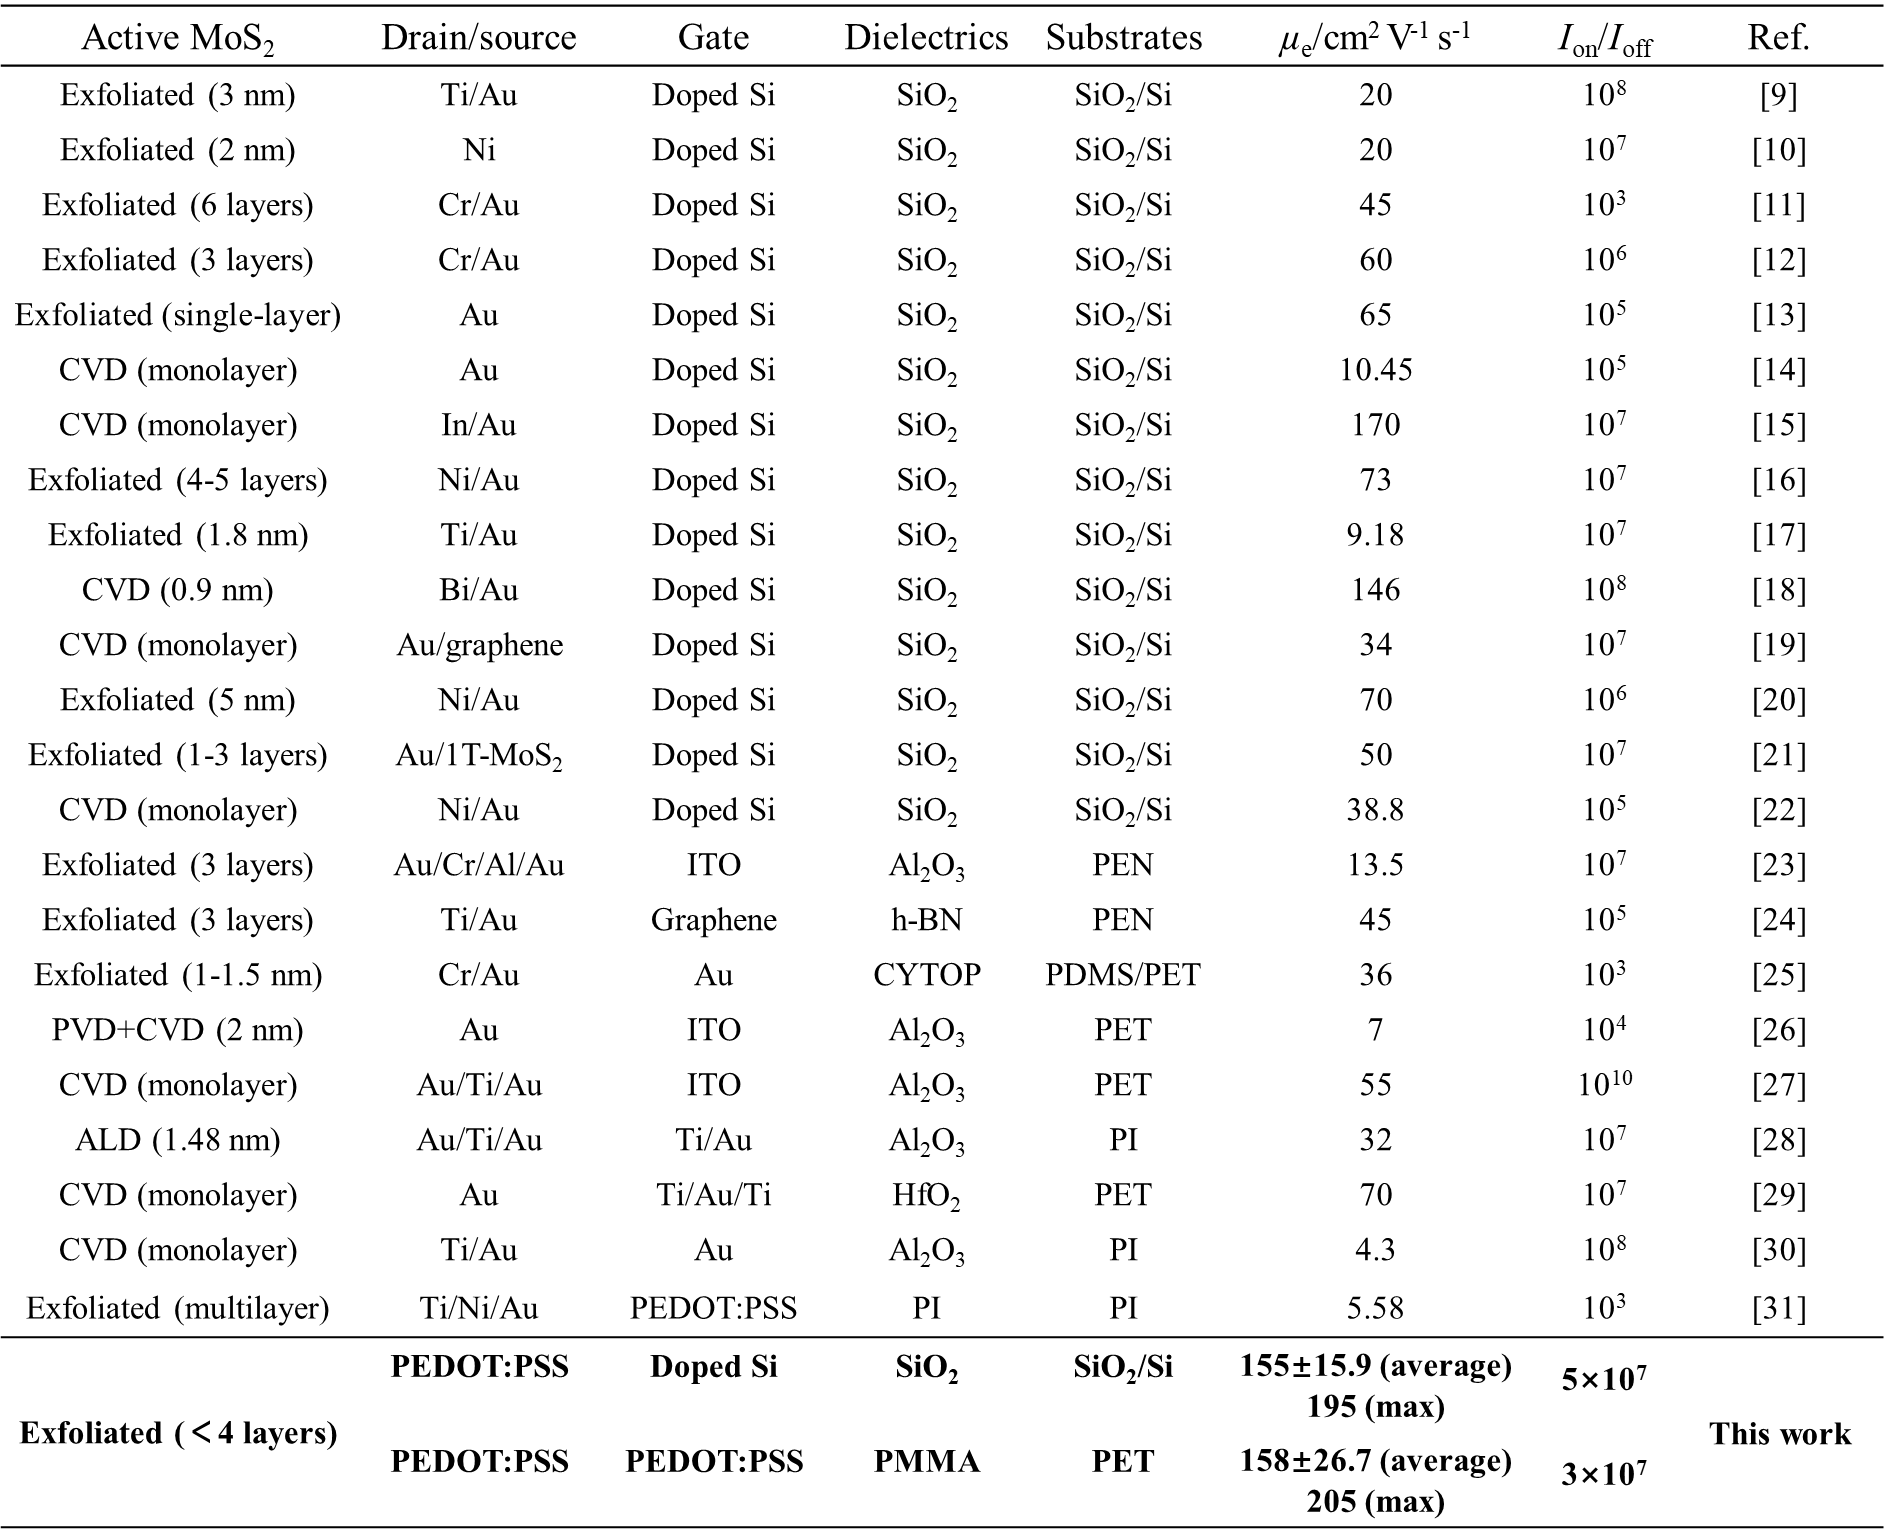


**
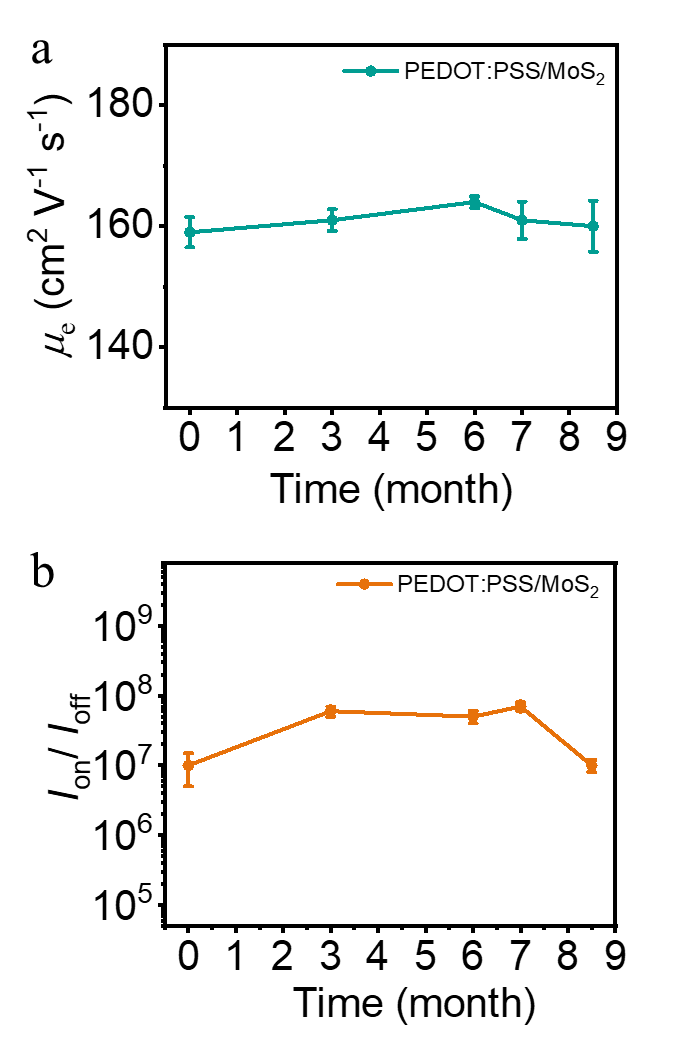
**

**Supplementary Fig. S18** **a,b**, Mobility (*µ*e) and current on-off ratio (*I*on/*I*off) in PEDOT:PSS/MoS2 FETs as a function of storage time in the atmosphere.

**
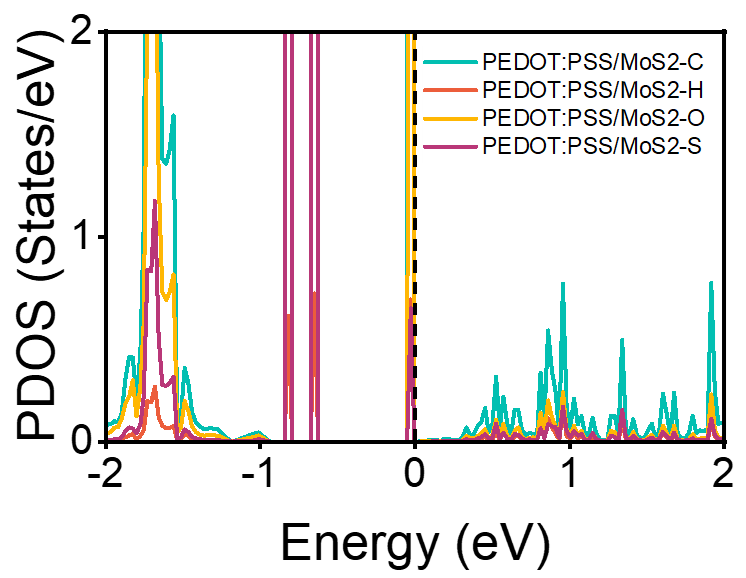
**

**Supplementary Fig. S18** PDOS of PEDOT:PSS.


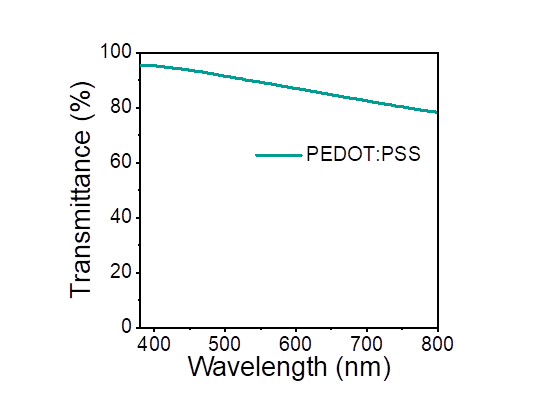


**Supplementary Fig. S20** Transmittance spectra of PEDOT:PSS electrode with the average transmittance of 87.4%.

**
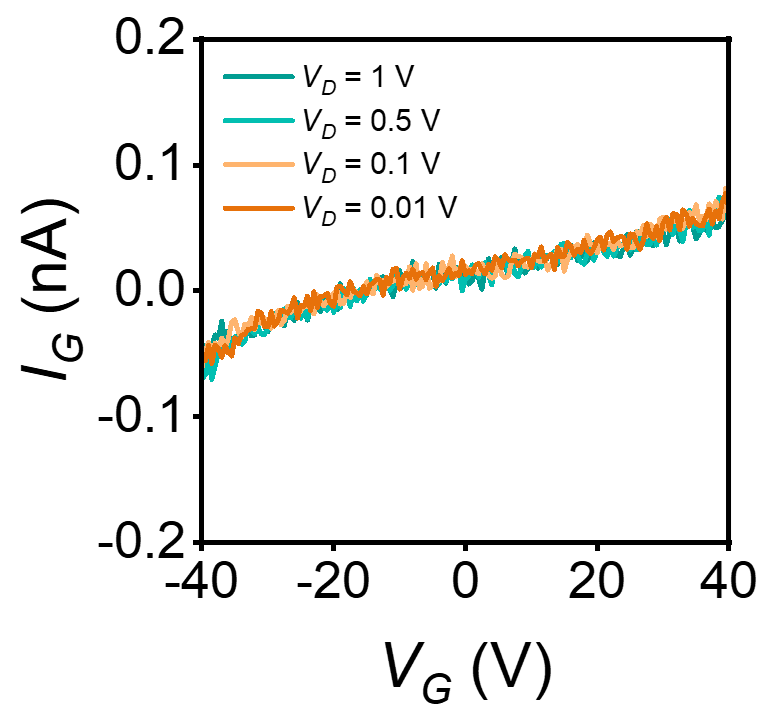
**

**Supplementary Fig. S21** *I*G-*V*G curves for transparent flexible 2D FET at various *V*D.

**Supplementary Table S3. Performance statistics of the transparent flexible MoS2 FETs based on PEDOT:PSS electrodes with the *L/W* of 20/13 μm.**


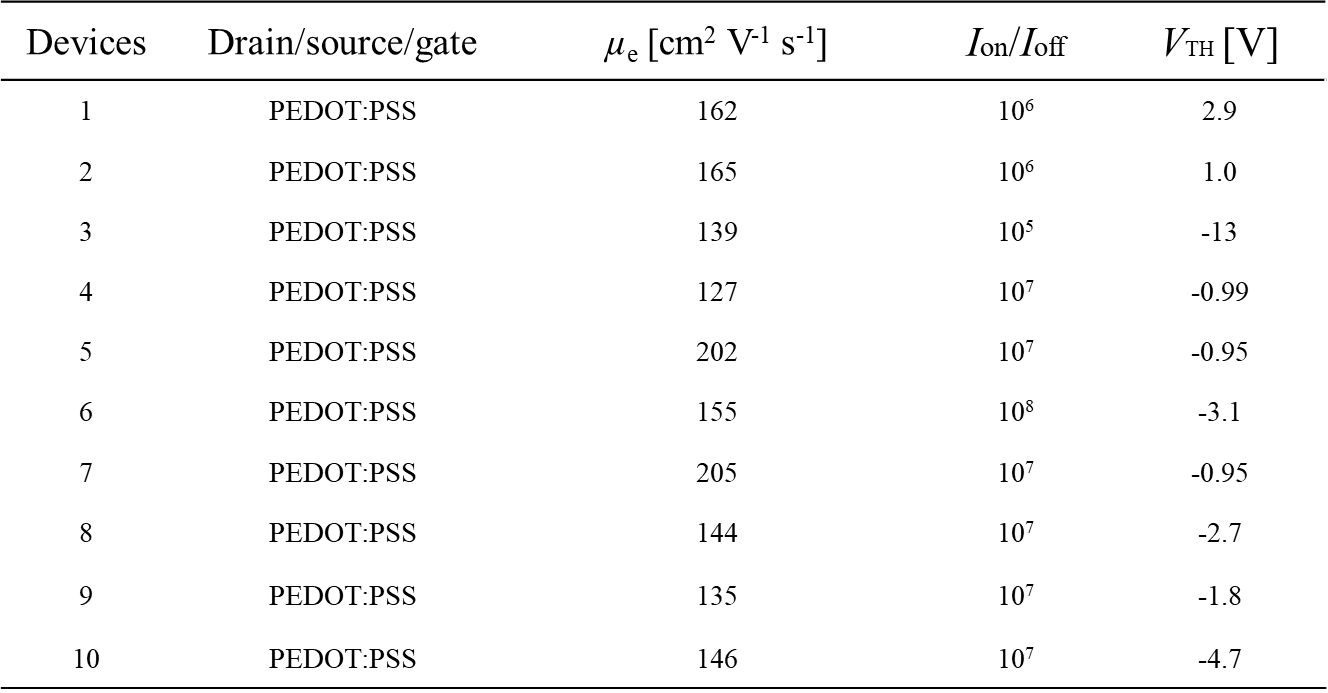


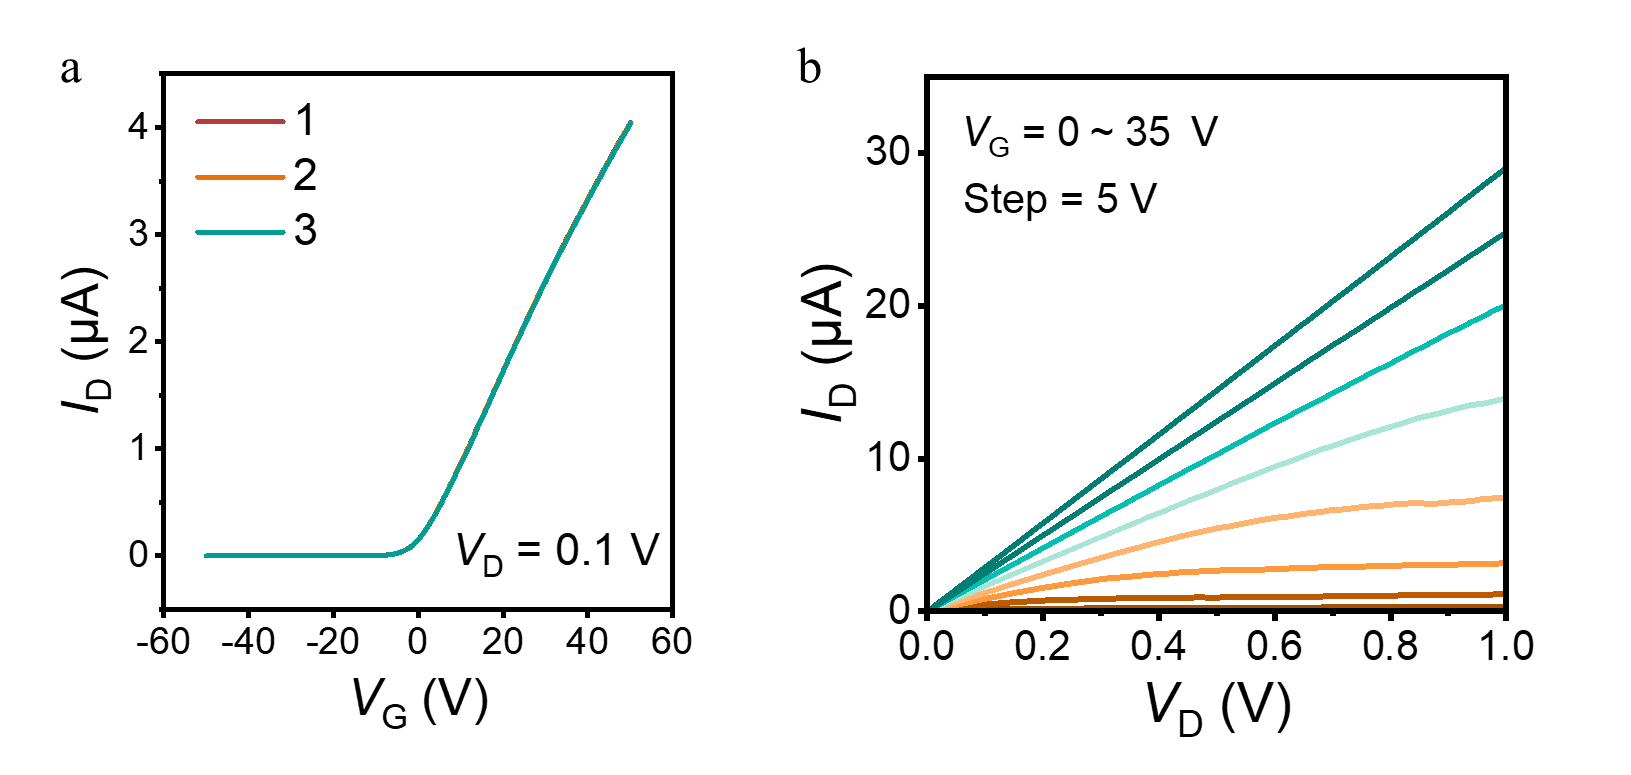


**Supplementary Fig. S22 a,** Multipletransfer curves at *V*D = 0.1 V for the transparent flexible MoS2 FET based on PEDOT:PSS electrodes with the maximum mobility value of 205 cm2 V-1 s-1. *L/W* = 20/13 μm. **b,** Output characteristics of the MoS2 FET with *V*G from 0 to 35 V in 5 V steps.


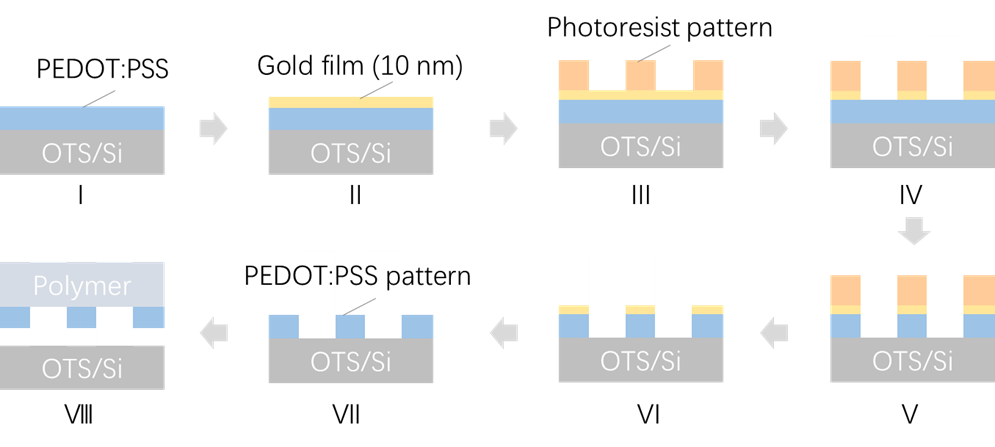


**Supplementary Fig. S23** Fabrication process for lithographic PEDOT:PSS electrode.

**Fabrication Details**

**Supplementary Fig. S23** illustrates the fabrication process of the lithographic PEDOT:PSS electrode. Initially, an aqueous solution of PEDOT:PSS (Clevios PH1000), mixed with ethylene glycol and a surfactant, is spin-coated onto a substrate modified with OTS (Step Ⅰ). Nitric acid is then used to selectively remove portions of the PSS component from the PEDOT:PSS film, with the extent of removal controlled by varying the immersion time. This acid treatment enhances both the stability in aqueous solution and the conductivity of the PEDOT:PSS film. Subsequently, a 10-nm-thick gold film is deposited on the PEDOT:PSS film to serve as a protective layer during the lithography process (Step Ⅱ). Traditional lithography is performed on the gold film, rather than directly on the PEDOT:PSS film, to obtain a photoresist pattern on the gold layer (Step Ⅲ). A metal etchant is employed to selectively etch away the gold film that is not covered by the photoresist pattern (Step Ⅳ). The PEDOT:PSS microelectrode pattern is defined using lithography, followed by etching the exposed areas with oxygen plasma (Step Ⅴ). The residual photoresist is then removed using acetone (Step Ⅵ). The gold film on the PEDOT:PSS pattern is subsequently etched away using a metal etchant, resulting in the final PEDOT:PSS electrode pattern on the OTS-modified substrate (Step Ⅶ). Finally, the transparent PEDOT:PSS electrode can be transferred onto the target substrate with the aid of an organic polymer (Step Ⅷ).


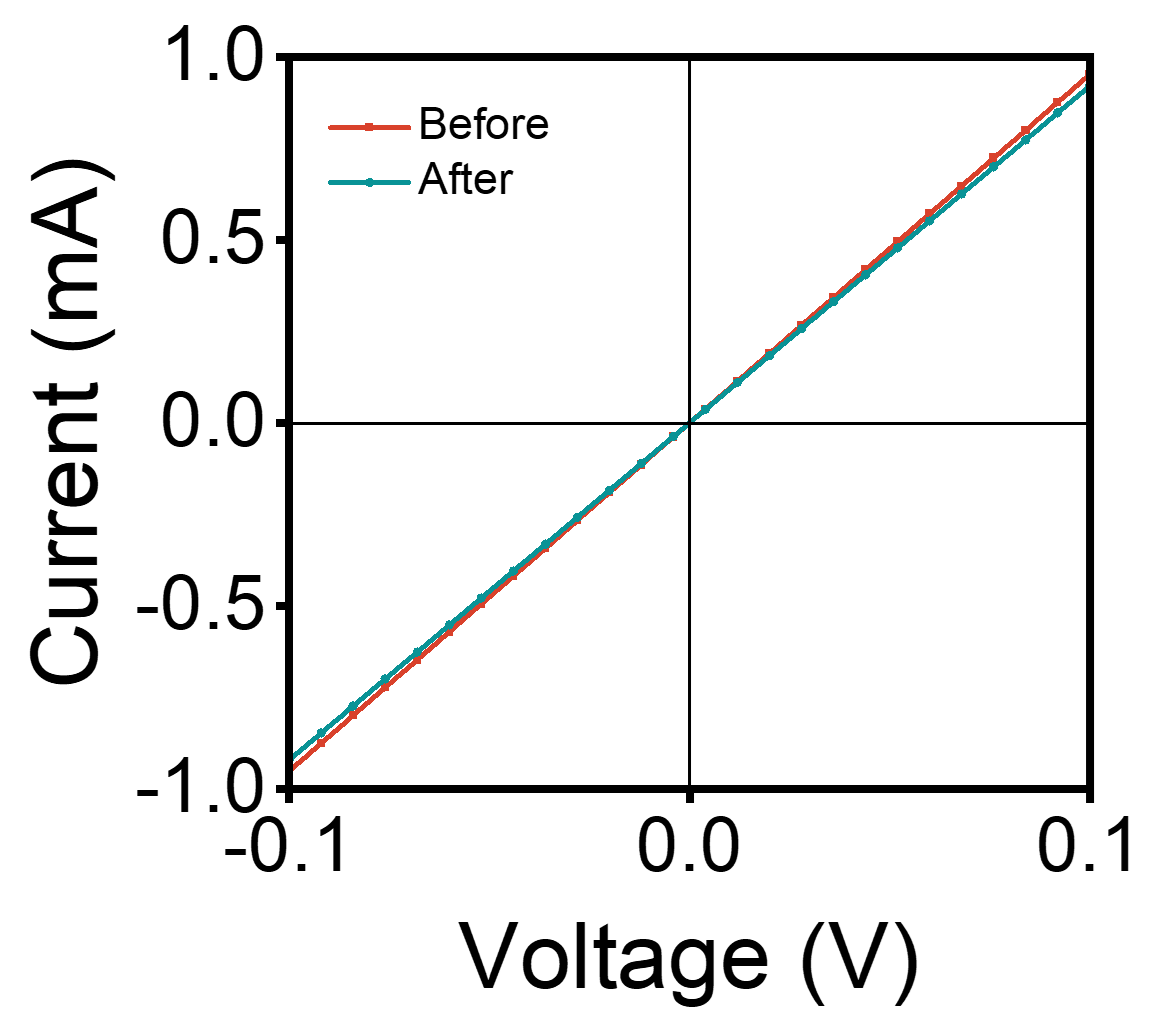


**Supplementary Fig. S24** *I-V* curves for PEDOT:PSS electrode before and after lithography process.

**
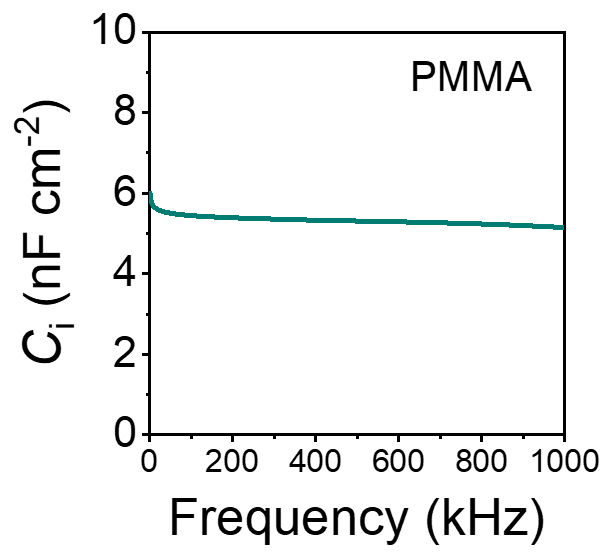
**

**Supplementary Fig. S25** *C*i-*f* curves for PMMA dielectric. The *C*i measured at 1kHz is 6 nF cm-2.

**References**

1. Kang, M. et al. Tunable Doping Strategy for Few-Layer MoS2 Field-Effect Transistors via NH3 Plasma Treatment. *ACS Appl. Mater. Interfaces* **16**, 43849-43859(2024).

2. Seo, D. et al. High-performance monolayer MoS2 field-effect transistor with large-scale nitrogen-doped graphene electrodes for Ohmic contact.*Appl. Phys. Lett.* **115**, 012104 (2019).

3. Singh, A. K. et al. Ultraviolet-light-induced reversible and stable carrier modulation in MoS₂ field-effect transistors. *Adv. Funct. Mater.* **24**, 7125-7132 (2014).

4. Zhao, B. et al.18.9% efficiency binary organic solar cells enabled by regulating the intrinsic properties of PEDOT:PSS. *Adv. Funct. Mater.* **34**, 2309832 (2023).

5. Cao, J. et al. A new surface-potential-based compact model for the MoS2 field effect transistors in active matrix display applications. *J. Appl. Phys.***123**, 064501 (2018)

6. Cao, J. et al. A new velocity saturation model of MoS2 field effect transistors. *IEEE Electron Device Lett.* **39**, 893-896 (2018).

7. Cao, W. et al. A compact current-voltage model for 2D semiconductor based field-effect transistors considering interface traps, mobility degradation, and inefficient doping effect. *IEEE Trans. Electron Devices* 61, 4282-4290 (2014).

8. Liu, Y. et al.Approaching the Schottky-Mott limit in van der Waals metal-semiconductor junctions. *Nature* **557**, 696-700 (2018)

9. Guo, Y. et al*.* Charge trapping at the MoS2-SiO2 interface and its effects on the characteristics of MoS2 metal-oxide-semiconductor field effect transistors. *Appl. Phys. Lett.* **106**,103109(2015).

10. Arnold, AJ. et al. Mimicking neurotransmitter release in chemical synapses via hysteresis engineering in MoS2 transistors. *ACS Nano* **11**, 3110-3118 (2017).

11. Yang, H., Cai, S., Wu, D. & Fang, X. Humidity-dependent characteristics of few-layer MoS2 field effect transistors. *Adv. Electron. Mater.* **6,** 2000659(2020).

12. Lee, D.et al. Remote modulation doping in van der Waals heterostructure transistors. *Nat Electron.* **4**, 664-670 (2021).

13. Jariwala, D.et al. Band-like transport in high mobility unencapsulated single-layer MoS2 transistors. *Appl. Phys. Lett.* **102**, 173107 (2013).

14. Shen, Y.-C.et al. Design of versatile top-down transfer by thermal release tape/poly(methyl methacrylate) (TRT/PMMA) bi-supporting layers toward all-transfer transition metal dichalcogenide material based transistor arrays. *Small Sci.* **4**, 2300144 (2024).

15. Wang, Y. et al. Van der Waals contacts between three-dimensional metals and two-dimensional semiconductors. *Nature* **568**, 70-74 (2019).

16. Wang J. L.et al. High mobility MoS2 transistor with low schottky barrier contact by using atomic thick h-BN as a tunneling layer. *Adv. Mater.* **28**, 8302-8308 (2016).

17. Guo, S. Q. et al. Integrated contact lens sensor system based on multifunctional ultrathin MoS2 transistors. *Matter* **4**, 969-985 (2021).

18. Li, H. et al. Bridging synthesis and controllable doping of monolayer 4 in. length transition-metal dichalcogenides single crystals with high electron mobility. *Adv. Mater.* **35**, 2211536 (2023).

19. Wu, Y. H. et al. All-transfer electrode interface engineering toward harsh-environment-resistant MoS2 field-effect transistors. *Adv. Mater.* **35**, 2210735 (2023).

20. Hemanjaneyulu, K., Kumar, J. & Shrivastava, M. MoS2 doping using potassium iodide for reliable contacts and efficient FET operation. *IEEE Trans. Electron Devices* **66**, 3224-3228 (2019).

21. Kappera, R. et al. Phase-engineered low-resistance contacts for ultrathin MoS2 transistors. *Nat. Mater.* **13**, 1128-1134 (2014).

22. Wang, C. L.et al. High-quality MoS2 monolayers with largely enhanced electrical properties by plasma-treated SiO2/Si substrates based chemical vapor deposition. *Appl. Surf. Sci.* **655**, 159693 (2024).

23. Yang, H., Chen, X., Wu, D. & Fang, X. High-performance flexible MoS2 transistors using Au/Cr/Al/Au as source/drain electrodes. *Adv. Electron. Mater.* **9,** 2300277(2023).

24. Lee, G.-H.et al. Flexible and transparent MoS2 field-effect transistors on hexagonal boron nitride-graphene heterostructures. *ACS Nano* **7**, 7931-7936 (2013).

25. Lee, H. et al. Highly efficient thin-film transistor via cross-linking of 1T edge functional 2H molybdenum disulfides. *ACS Nano* **11**,12832-12839 (2017).

26. Tsai, M.-Y. et al. Flexible MoS2 field-effect transistors for gate-tunable piezoresistive strain sensors. *ACS Appl. Mater. Interfaces* **7**, 12850-12855 (2015).

27. Li, N. et al. Large-scale flexible and transparent electronics based on monolayer molybdenum disulfide field-effect transistors. *Nat. Electron.* **3**, 711-717 (2020).

28. Aspiotis, N.et al. Large-area synthesis of high electrical performance MoS2 by a commercially scalable atomic layer deposition process. *npj 2D Mater. Appl.* **7**, 18 (2023).

29. Tang, J. et al. Low power flexible monolayer MoS2 integrated circuits. *Nat. Commun.* **14**, 3633 (2023).

30. Amani, M., Burke, RA., Proie, RM. & Dubey, M. Flexible integrated circuits and multifunctional electronics based on single atomic layers of MoS2 and graphene. *Nanotechnology* **26**, 115202 (2015).

31. Shin, JM.et al. Induction heating effect on the performance of flexible MoS2 field-effect transistors. *Appl. Phys. Lett.* **111**, 153105 (2017).
